# Supplementary material
Source: Springer Nature journal article supplement (https://www.springermedizin.de/resource/supplementary/12916_2010_279_MOESM3_ESM.pdf/9599540)
Supplement: MOESM3 [file 9599540]

Search for articles using prognostic search string

- MEDLINE 2005
- 2076 articles identified

References excluded (n=2029)

- 1928 excluded based on abstract
- 101 excluded based on full article

Reasons for exclusion

- Print copy 2006 (91)
- Not cancer, not study on humans (123)
- Not prognosis (722)
- Not survival analysis (284)
- Microarray, proteomic (12)
- No model developed (158)
- Model assessing single marker only (540)
- Not multivariate analysis (10)
- Logistic regression model (8)
- Validation only (63)
- Other (18)

Articles eligible for review (n=47)
